# Supplementary material for: Modulation of SIV and HIV DNA Vaccine Immunity by Fas-FasL Signaling
Source: PubMed Central journal article supplement (PMC4379579; doi:10.3390/v7031429), 2015-03-23
Supplement: viruses-07-01429-s001.pdf [file viruses-07-01429-s001.pdf]

## Modulation of SIV and HIV DNA Vaccine Immunity by Fas-FasL Signaling

Jiabin Yan, Juan Carlos Zapata, Charles David Pauza and Maria S. Salvato

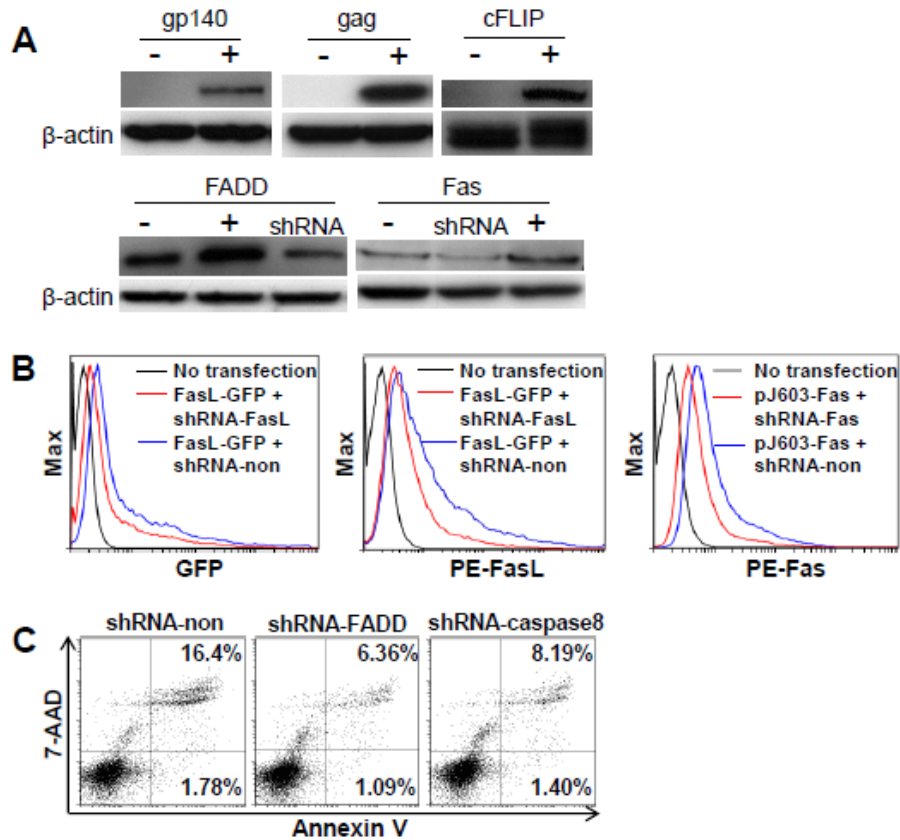

**Figure S1.** Evidence for gene expression and function of plasmids in cell culture. (A) Western blot assay. Plasmids pcDNA3.1-gp140, pJ603-gag, pJ603-cFLIP, pJ603-FADD, pJ603-Fas, shRNA-FADD, and shRNA-Fas were transfected into L-929 cells. Cell lysates were prepared 48h after transfection. HIV-1 gp120B sheep antiserum, mouse monoclonal antibody (mAb) to SIV p27, polyclonal antibodies for murine cFLIP, FADD, and Fas were used to detect the corresponding protein in cell lysates; (B) *In vitro* gene silencing assay. Plasmids FasL-GFP, shRNA-non, shRNA-Fas, shRNA-FasL and pJ603-Fas were transfected into L-929 cells. Cells were harvested 48h after transfection. Cell surface expression of GFP, Fas and FasL was analyzed by flow cytometry; (C) *In vitro* apoptosis assay. Plasmids shRNA-non, shRNA-FADD and shRNA-caspase 8 were transfected into P815 cells. 24h later, anti-Fas monoclonal antibody (Jo2 clone) and Protein G were added to incubate for 2h before apoptosis analysis by Annexin V staining. Both shRNA-FADD and shRNA-caspase 8 transfection reduced apoptosis induced by Fas antibody crosslinking. Data in (A) to (C) are representative of two independent experiments with similar results.

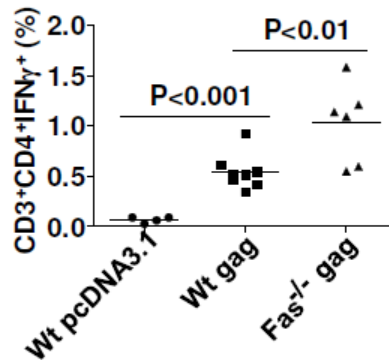

**Figure S2.** Fas signaling impaired the function of CD4 T helper cells induced by DNA vaccination. Wild type C57BL/6 mice and their cognate KO mice were immunized with 10  $\mu$ g plasmid pJ603-gag at day 0 and day 28. Mice were euthanized 10 days after the last immunization and splenocytes were prepared for cell-mediated immune (CMI) response assay. Data for Fas KO + pcDNA3.1 control was similar to the wild-type control data.

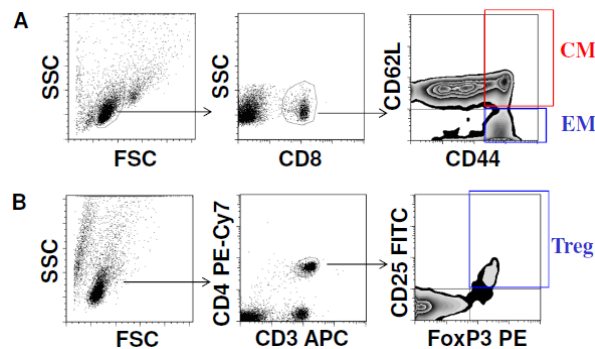

**Figure S3.** Cell gating strategies for memory cells and regulatory T (Treg) cells. (A) Memory CD8<sup>+</sup> cells were gated on lymphocytes population from mouse splenocytes. Effector memory cells (EM) are defined as CD44<sup>hi</sup>CD62L<sup>lo</sup> population while central memory cells (CM) are defined as CD44<sup>hi</sup>CD62L<sup>hi</sup> population; (B) Treg cells are defined as CD3<sup>+</sup>CD4<sup>+</sup>CD25<sup>hi</sup>FoxP3<sup>+</sup>.

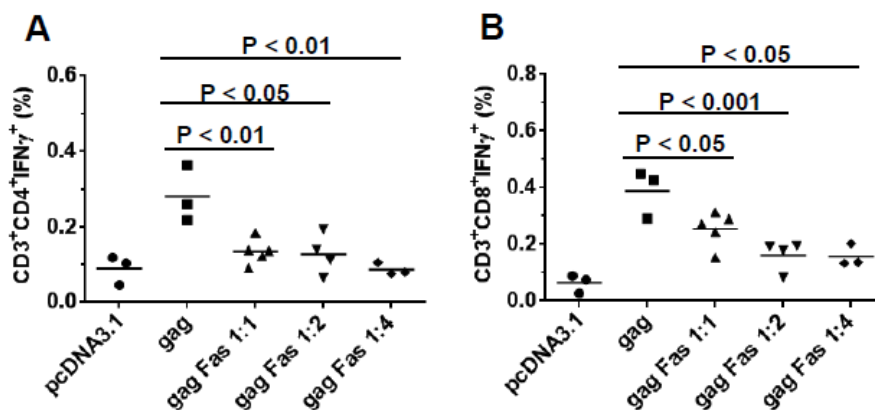

**Figure S4.** Fas overexpression impaired primary cell-mediated immune CMI responses induced by DNA vaccination. Wild type C57BL/6 mice were immunized with 10  $\mu$ g plasmid pJ603-gag at day 0. Mice were euthanized 10 days after the last immunization and splenocytes were prepared for CMI assay. (A) CD4 helper cells; (B) CD8 T cells.

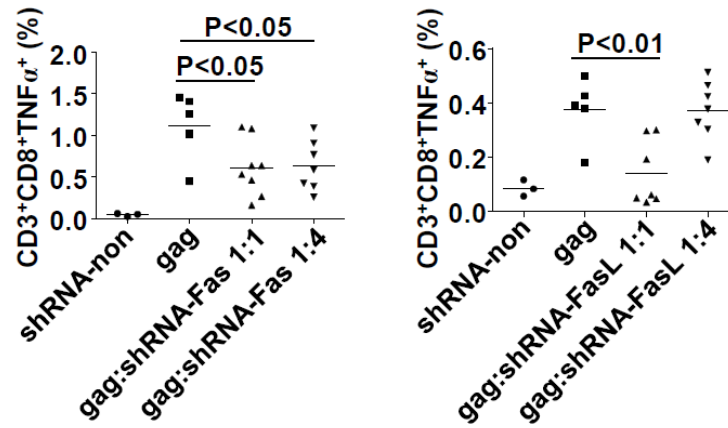

**Figure S5.** *In vivo* gene silencing of Fas and FasL did not improve CMI responses for SIVmac Gag. C57BL/6 mice were immunized with 2  $\mu$ g or 8  $\mu$ g plasmids shRNA Fas or shRNA-FasL at day 0 and day 28. Mice were euthanized 10 d after the last immunization and splenocytes were prepared for CMI assay.

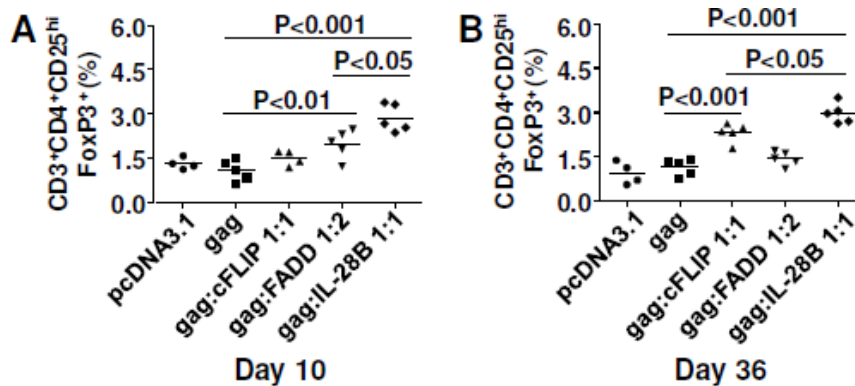

**Figure S6.** cFLIP, FADD and IL-28B co-delivery upregulated regulatory T (Treg) cells after DNA vaccination with SIVmac Gag. C57BL/6 mice were immunized with 2  $\mu$ g plasmid pJ603-gag combined with 2  $\mu$ g plasmid pJ603-cFLIP or plasmid IL-28B or 4  $\mu$ g plasmid pJ603-FADD at day 0 and day 28. Mice were euthanized 10 (A) or 36 (B) days after the last immunization and splenocytes were prepared for cellular immune response assay; Data in (A) and (B) are representative of two independent experiments with similar results ( $n = 5$  except for control group where  $n = 4$ ).

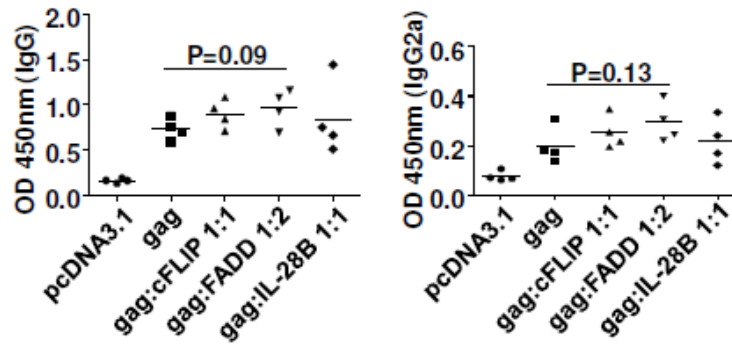

**Figure S7.** cFLIP, FADD and IL-28B co-delivery had little influence on humoral immune responses after DNA vaccination with SIVmac Gag. C57BL/6 mice were immunized with 2  $\mu$ g plasmid pJ603-gag combined with 2  $\mu$ g plasmid pJ603-cFLIP or plasmid IL-28B or 4  $\mu$ g plasmid pJ603-FADD at day 0 and day 28. Sera were collected 36 days after the last immunization and diluted 100-fold before ELISA. (Left) Total IgG assay. (Right) IgG2a assay. Data are representative of two independent experiments with similar results ( $n = 5$  except for control group where  $n = 4$ ).

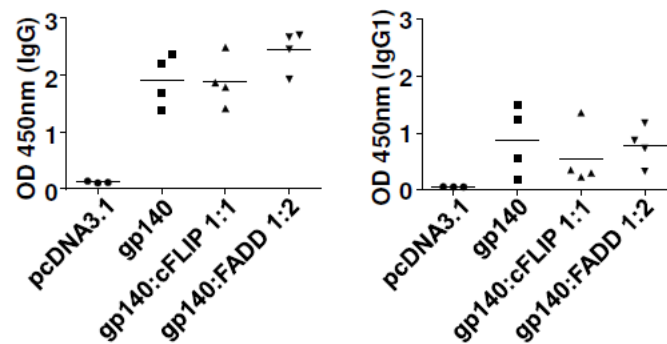

**Figure S8.** cFLIP and FADD co-delivery had little influence on total IgG (Left) or IgG1 (Right) titers after DNA vaccination with HIVBal gp140. C57BL/6 mice were immunized with 2  $\mu$ g plasmid pJ603-gag combined with 2  $\mu$ g plasmid pJ603-cFLIP or 4  $\mu$ g plasmid pJ603-FADD at day 0 and day 28. Sera were collected 10 days after the last immunization and diluted 300-fold before ELISA. Data are representative of two independent experiments with similar results ( $n = 5$  except for control group where  $n = 4$ ).

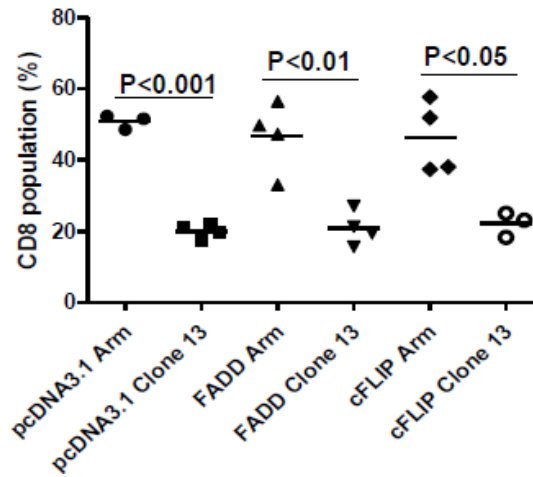

**Figure S9.** CD8 T cells are significantly deleted during chronic lymphocytic choriomeningitis virus (LCMV) infection. Mice were electroporated with 2  $\mu$ g plasmids of pcDNA.3.1, FADD or cFLIP on day zero (d0). On day 7, mice were infected with either  $2 \times 10^5$  plaque-forming units (PFU) LCMV-Armstrong i.p. or  $2 \times 10^6$  PFU LCMV-Clone13 i.v.. Nine days later, mice were sacrificed and assessed for CMI.

**Table S1.** Multiple Comparison Analyses of Figures 1-8. <sup>1</sup>

| Figure     | Treatment                  | i/j               |               |                   |               |                   |     | LSmean     |
|------------|----------------------------|-------------------|---------------|-------------------|---------------|-------------------|-----|------------|
|            |                            | (1)               | (2)           | (3)               | (4)           | (5)               | (6) |            |
| 1B lft     |                            |                   |               |                   |               |                   |     |            |
| 1way ANOVA | (1) Fas <sup>-/-</sup> gag |                   | <b>0.0084</b> | <b>0.0003</b>     |               |                   |     | 6.55333333 |
|            | (2) WTgag                  | <b>0.0084</b>     |               | 0.0629            |               |                   |     | 2.95750000 |
|            | (3) pcDNA                  | <b>0.0003</b>     | 0.0629        |                   |               |                   |     | 0.08100000 |
| 1B rt      |                            |                   |               |                   |               |                   |     |            |
| 1way ANOVA | (1) Fas <sup>-/-</sup> gag |                   | <b>0.0006</b> | <b>&lt;0.0001</b> |               |                   |     | 4.15333333 |
|            | (2) WTgag                  | <b>0.0006</b>     |               | 0.0602            |               |                   |     | 1.56200000 |
|            | (3) pcDNA                  | <b>&lt;0.0001</b> | 0.0602        |                   |               |                   |     | 0.03525000 |
| 1C m       |                            |                   |               |                   |               |                   |     |            |
| 1way ANOVA | (1) gag                    |                   | <b>0.0008</b> | <b>&lt;0.0001</b> | <b>0.0004</b> | <b>&lt;0.0001</b> |     | 0.62660000 |
|            | (2) gag Fas 1:1            | <b>0.0008</b>     |               | 0.6059            | 0.9971        | 0.2150            |     | 0.23960000 |
|            | (3) gag Fas 1:2            | <b>&lt;0.0001</b> | 0.6059        |                   | 0.7955        | 0.8648            |     | 0.12780000 |

Table S1. Cont.

| Figure     | Treatment          | i/j               |                   |                   |                   |                   | LSmean     |
|------------|--------------------|-------------------|-------------------|-------------------|-------------------|-------------------|------------|
|            |                    | (1)               | (2)               | (3)               | (4)               | (5)               |            |
|            | (4) gag Fas 1:3    | <b>0.0004</b>     | 0.9971            | 0.7955            |                   | 0.3338            | 0.21400000 |
|            | (5) pcDNA          | <b>&lt;0.0001</b> | 0.2150            | 0.8648            | 0.3338            |                   | 0.04133333 |
| 1C lft     |                    |                   |                   |                   |                   |                   |            |
| 1way ANOVA | (1) gag            |                   | 0.9998            | 0.1116            | 0.3897            | <b>0.0146</b>     | 3.31800000 |
|            | (2) gag Fas 1:1    | 0.9998            |                   | 0.1481            | 0.4762            | <b>0.0194</b>     | 3.19600000 |
|            | (3) gag Fas 1:2    | 0.1116            | 0.1481            |                   | 0.9340            | 0.6536            | 1.30520000 |
|            | (4) gag Fas 1:3    | 0.3897            | 0.4762            | 0.9340            |                   | 0.2865            | 1.90600000 |
|            | (5) pcDNA          | <b>0.0146</b>     | <b>0.0194</b>     | 0.6536            | 0.2865            |                   | 0.08266667 |
| 1C lft     |                    |                   |                   |                   |                   |                   |            |
| 2way ANOVA | (1) gag Fas 1:1    |                   | <b>0.0030</b>     | 0.1014            | 0.9663            | <b>&lt;0.0001</b> | 3.06400000 |
|            | (2) gag Fas 1:2    | <b>0.0030</b>     |                   | 0.6513            | <b>0.0004</b>     | 0.1855            | 1.26760000 |
|            | (3) gag Fas 1:3    | 0.1014            | 0.6513            |                   | <b>0.0220</b>     | <b>0.0118</b>     | 1.89600000 |
|            | (4) gag            | 0.9663            | <b>0.0004</b>     | <b>0.0220</b>     |                   | <b>&lt;0.0001</b> | 3.36100000 |
|            | (5) pcDNA          | <b>&lt;0.0001</b> | 0.1855            | <b>0.0118</b>     | <b>&lt;0.0001</b> |                   | 0.07800000 |
| 2A lft     |                    |                   |                   |                   |                   |                   |            |
| 1way ANOVA | (1) gag            |                   | 0.9927            | 0.9999            | <b>0.0215</b>     |                   | 7.05600000 |
|            | (2)gag:shRFas 1:1  | 0.9727            |                   | 0.9807            | <b>0.0204</b>     |                   | 6.59625000 |
|            | (3)gag:shRFas 1:4  | 0.9999            | 0.9807            |                   | <b>0.0126</b>     |                   | 7.17857143 |
|            | (4) shRNA-non      | <b>0.0215</b>     | <b>0.0204</b>     | <b>0.0126</b>     |                   |                   | 0.10166667 |
| 2A rt      |                    |                   |                   |                   |                   |                   |            |
| 1way ANOVA | (1) gag            |                   | 1.0000            | 0.9980            | <b>0.0081</b>     |                   | 5.36200000 |
|            | (2)gag:shRFasL 1:1 | 1.0000            |                   | 0.9974            | <b>0.0051</b>     |                   | 5.36000000 |
|            | (3)gag:shRFasL 1:4 | 0.9980            | 0.9974            |                   | <b>0.0059</b>     |                   | 5.16375000 |
|            | (4) shRNA-non      | <b>0.0081</b>     | <b>0.0051</b>     | <b>0.0059</b>     |                   |                   | 0.07666667 |
| 2B lft     |                    |                   |                   |                   |                   |                   |            |
| 1way ANOVA | (1) gag            |                   | <b>0.0432</b>     | 0.1196            | <b>0.0035</b>     |                   | 0.59420000 |
|            | (2)gag:shRFas 1:1  | <b>0.0432</b>     |                   | 0.9563            | 0.2478            |                   | 0.31700000 |
|            | (3)gag:shRFas 1:4  | 0.1196            | 0.9563            |                   | 0.1387            |                   | 0.36128571 |
|            | (4) shRNA-non      | <b>0.0035</b>     | 0.2478            | 0.1387            |                   |                   | 0.09633333 |
| 2B rt      |                    |                   |                   |                   |                   |                   |            |
| 1way ANOVA | (1) gag            |                   | 0.0689            | 0.5305            | <b>0.0036</b>     |                   | 0.48480000 |
|            | (2)gag:shRFasL 1:1 | 0.0689            |                   | 0.5345            | 0.1799            |                   | 0.27950000 |
|            | (3)gag:shRFasL 1:4 | 0.5305            | 0.5345            |                   | <b>0.0269</b>     |                   | 0.37557143 |
|            | (4) shRNA-non      | <b>0.0036</b>     | 0.1799            | <b>0.0269</b>     |                   |                   | 0.08366667 |
| 2C lft     |                    |                   |                   |                   |                   |                   |            |
| 1way ANOVA | (1) gag            |                   | <b>0.0225</b>     | <b>0.0060</b>     |                   |                   | 1.35600000 |
|            | (2)gag:shRFas 1:1  | <b>0.0225</b>     |                   | 0.8613            |                   |                   | 2.24875000 |
|            | (3)gag:shRFas 1:4  | <b>0.0060</b>     | 0.8613            |                   |                   |                   | 2.44714286 |
|            | (4) shRNA-non      | 0.3473            | <b>0.0012</b>     | <b>0.0004</b>     |                   |                   | 0.74533333 |
| 2C rt      |                    |                   |                   |                   |                   |                   |            |
| 1way ANOVA | (1) gag            |                   | <b>&lt;0.0001</b> | 0.9998            | 0.1772            |                   | 1.77800000 |
|            | (2)gag:shRFasL 1:1 | <b>&lt;0.0001</b> |                   | <b>&lt;0.0001</b> | <b>&lt;0.0001</b> |                   | 3.21571429 |

Table S1. Cont.

| Figure     | Treatment              | i/j           |               |               |               |               |     | LSmean      |
|------------|------------------------|---------------|---------------|---------------|---------------|---------------|-----|-------------|
|            |                        | (1)           | (2)           | (3)           | (4)           | (5)           | (6) |             |
|            | (3)gag:shRFasL 1:4     | 0.9998        | <0.0001       |               | 0.1484        |               |     | 1.76125000  |
|            | (4) shRNA-non          | 0.1772        | <0.0001       | 0.1484        |               |               |     | 1.95000000  |
| 3A         |                        |               |               |               |               |               |     |             |
| 1way ANOVA | (1) gag: 150 µg α-FasL |               | <b>0.0051</b> | <b>0.0276</b> | 0.3816        |               |     | 1.41240000  |
|            | (2)gag:150 µg isotype  | <b>0.0051</b> |               | 0.8223        | <b>0.0003</b> |               |     | 4.41400000  |
|            | (3) gag: 300 µg α-FasL | <b>0.0276</b> | 0.8223        |               | <b>0.0016</b> |               |     | 3.77400000  |
|            | (4) pcDNA              | 0.3816        | <b>0.0003</b> | <b>0.0016</b> |               |               |     | 0.11725000  |
| 3B         |                        |               |               |               |               |               |     |             |
| 1way ANOVA | (1) gag: 150 µg α-FasL |               | <b>0.0036</b> | <b>0.0007</b> | 0.3144        |               |     | 6.05400000  |
|            | (2)gag:150 µg isotype  | <b>0.0036</b> |               | 0.8499        | <b>0.0002</b> |               |     | 10.43200000 |
|            | (3) gag: 300 µg α-FasL | <b>0.0007</b> | 0.8499        |               | <0.0001       |               |     | 11.26600000 |
|            | (4) pcDNA              | 0.3144        | <b>0.0002</b> | <0.0001       |               |               |     | 4.09000000  |
| 3C         |                        |               |               |               |               |               |     |             |
| 1way ANOVA | (1) gag: 150 µg α-FasL |               | 0.1515        | 0.3305        | 0.6910        |               |     | 0.28440000  |
|            | (2)gag:150 µg isotype  | 0.1515        |               | 0.9567        | <b>0.0253</b> |               |     | 0.72800000  |
|            | (3) gag: 300 µg α-FasL | 0.3305        | 0.9567        |               | 0.0623        |               |     | 0.62900000  |
|            | (4) pcDNA              | 0.6910        | <b>0.0253</b> | 0.0623        |               |               |     | 0.05425000  |
| 3D         |                        |               |               |               |               |               |     |             |
| 1way ANOVA | (1) gag: 150 µg α-FasL |               | <b>0.0059</b> | 0.9181        | <b>0.0002</b> |               |     | 2.22600000  |
|            | (2)gag:150 µg isotype  | <b>0.0059</b> |               | <b>0.0206</b> | 0.2021        |               |     | 1.35200000  |
|            | (3) gag: 300 µg α-FasL | 0.9181        | <b>0.0206</b> |               | <b>0.0005</b> |               |     | 2.08600000  |
|            | (4) pcDNA              | <b>0.0002</b> | 0.2021        | <b>0.0005</b> |               |               |     | 0.86650000  |
| 4A lft     |                        |               |               |               |               |               |     |             |
| 1way ANOVA | (1) gag                |               | 0.1242        | <b>0.0340</b> | 0.4133        | <b>0.0309</b> |     | 3.65800000  |
|            | (2) gag FADD1:2        | 0.1242        |               | 0.9624        | 0.9400        | <b>0.0002</b> |     | 6.42800000  |
|            | (3) gag IL28 1:1       | <b>0.0340</b> | 0.9624        |               | 0.6249        | <0.0001       |     | 7.15000000  |
|            | (4) gag cFLIP 1:1      | 0.4133        | 0.9400        | 0.6249        |               | <b>0.0011</b> |     | 5.60200000  |
|            | (5) pcDNA              | <b>0.0309</b> | <b>0.0002</b> | <0.0001       | <b>0.0011</b> |               |     | 0.04500000  |
| 4A lft     |                        |               |               |               |               |               |     |             |
| 2way ANOVA | (1) gag                |               | <b>0.0003</b> | <0.0001       | <b>0.0054</b> | <b>0.0004</b> |     | 3.41700000  |
|            | (2) gag FADD1:2        | <b>0.0003</b> |               | 0.9785        | 0.8846        | <0.0001       |     | 6.63900000  |
|            | (3) gag IL28 1:1       | <0.0001       | 0.9785        |               | 0.6249        | <0.0001       |     | 7.03700000  |
|            | (4) gag cFLIP 1:1      | <b>0.0054</b> | 0.8846        | 0.6249        |               | <0.0001       |     | 5.99300000  |
|            | (5) pcDNA              | <b>0.0004</b> | <0.0001       | <0.0001       | <b>0.0011</b> |               |     | 0.04512500  |
| 4A rt      |                        |               |               |               |               |               |     |             |
| 1way ANOVA | (1) gag                |               | 0.2304        | 0.1695        | 0.8704        | <b>0.0128</b> |     | 9.89600000  |
|            | (2) gag FADD1:2        | 0.2304        |               | 0.9997        | <b>0.0386</b> | <b>0.0001</b> |     | 13.46000000 |
|            | (3) gag IL28 1:1       | 0.1695        | 0.9997        |               | <b>0.0264</b> | <b>0.0001</b> |     | 13.76000000 |
|            | (4) gag cFLIP 1:1      | 0.8704        | <b>0.0386</b> | <b>0.0264</b> |               | <b>0.0825</b> |     | 8.32800000  |
|            | (5) pcDNA              | <b>0.0128</b> | <b>0.0001</b> | <b>0.0001</b> | <b>0.0825</b> |               |     | 3.54750000  |
| 4A rt      |                        |               |               |               |               |               |     |             |
| 2way ANOVA | (1) gag                |               | <b>0.0186</b> | <b>0.0057</b> | 0.8698        | <b>0.0001</b> |     | 9.88800000  |
|            | (2) gag FADD1:2        | <b>0.0186</b> |               | 0.9926        | <b>0.0012</b> | <b>0.0001</b> |     | 13.46000000 |

Table S1. Cont.

| Figure     | Treatment            | i/j           |                   |                   |                   |               | LSmean     |
|------------|----------------------|---------------|-------------------|-------------------|-------------------|---------------|------------|
|            |                      | (1)           | (2)               | (3)               | (4)               | (5)           |            |
|            | (3) gag IL28 1:1     | <b>0.0057</b> | 0.9926            |                   | <b>0.0003</b>     | <b>0.0001</b> | 13.9330000 |
|            | (4) gag cFLIP 1:1    | 0.8698        | <b>0.0012</b>     | <b>0.0003</b>     |                   | <b>0.0005</b> | 8.8270000  |
|            | (5) pcDNA            | <b>0.0001</b> | <b>0.0001</b>     | <b>0.0001</b>     | <b>0.0005</b>     |               | 3.5450000  |
| 4B rt      |                      |               |                   |                   |                   |               |            |
| 1way ANOVA | (1) gag              |               | <b>0.0672</b>     | 0.1924            | 0.8050            | 0.5893        | 5.9460000  |
|            | (2) gag FADD1:2      | <b>0.0672</b> |                   | 0.9775            | 0.4238            | <b>0.0042</b> | 8.5320000  |
|            | (3) gag IL28 1:1     | 0.1924        | 0.9775            |                   | 0.7583            | <b>0.0135</b> | 8.0140000  |
|            | (4) gag cFLIP 1:1    | 0.8050        | 0.4238            | 0.7583            |                   | 0.1296        | 6.9400000  |
|            | (5) pcDNA            | 0.5893        | <b>0.0042</b>     | <b>0.0135</b>     | 0.1296            |               | 4.5300000  |
| 4B rt      |                      |               |                   |                   |                   |               |            |
| 2way ANOVA | (1) gag              |               | <b>0.0011</b>     | <b>0.0148</b>     | 0.5148            | 0.1315        | 6.0290000  |
|            | (2) gag FADD1:2      | <b>0.0011</b> |                   | 0.8960            | 0.0805            | <b>0.0042</b> | 8.5300000  |
|            | (3) gag IL28 1:1     | <b>0.0148</b> | 0.8960            |                   | 0.4184            | <b>0.0135</b> | 7.9990000  |
|            | (4) gag cFLIP 1:1    | 0.5142        | 0.0805            | 0.4184            |                   | <b>0.0029</b> | 6.9670000  |
|            | (5) pcDNA            | 0.1315        | <b>0.0001</b>     | <b>0.0001</b>     | <b>0.0029</b>     |               | 4.5150000  |
| 4B lft     |                      |               |                   |                   |                   |               |            |
| 1way ANOVA | (1) gag              |               | 0.1127            | 0.2111            | 0.2796            | 0.1640        | 0.8246000  |
|            | (2) gag FADD1:2      | 0.1127        |                   | 0.9962            | 0.9826            | <b>0.0010</b> | 1.6038000  |
|            | (3) gag IL28 1:1     | 0.2111        | 0.9962            |                   | 0.9998            | <b>0.0021</b> | 1.4962000  |
|            | (4) gag cFLIP 1:1    | 0.2796        | 0.9826            | 0.9998            |                   | <b>0.0030</b> | 1.4430000  |
|            | (5) pcDNA            | 0.1640        | <b>0.0010</b>     | <b>0.0021</b>     | <b>0.0030</b>     |               | 0.0647500  |
| 4B lft     |                      |               |                   |                   |                   |               |            |
| 2way ANOVA | (1) gag              |               | <b>0.0008</b>     | <b>0.0040</b>     | <b>0.0051</b>     | <b>0.0076</b> | 0.8043000  |
|            | (2) gag FADD1:2      | <b>0.0008</b> |                   | 0.9824            | 0.9708            | <b>0.0001</b> | 1.6519000  |
|            | (3) gag IL28 1:1     | <b>0.0040</b> | 0.9824            |                   | 1.0000            | <b>0.0001</b> | 1.5461000  |
|            | (4) gag cFLIP 1:1    | <b>0.0051</b> | 0.9708            | 1.0000            |                   | <b>0.0001</b> | 1.5305000  |
|            | (5) pcDNA            | <b>0.0076</b> | <b>0.0001</b>     | <b>0.0001</b>     | <b>0.0001</b>     |               | 0.0636250  |
| 5A lft     |                      |               |                   |                   |                   |               |            |
| 1way ANOVA | (1) gp140            |               | <b>0.0089</b>     | <b>0.0180</b>     | <b>0.0133</b>     |               | 0.7135000  |
|            | (2) gp140 :FADD 1:2  | <b>0.0089</b> |                   | 0.9725            | <b>&lt;0.0001</b> |               | 1.3475000  |
|            | (3) gp140 :cFLIP 1:1 | <b>0.0180</b> | 0.9725            |                   | <b>&lt;0.0001</b> |               | 1.2805000  |
|            | (4) pcDNA            | <b>0.0133</b> | <b>&lt;0.0001</b> | <b>&lt;0.0001</b> |                   |               | 0.0703333  |
| 5A rt      |                      |               |                   |                   |                   |               |            |
| 1way ANOVA | (1) gp140            |               | <b>0.0146</b>     | 0.6272            | <b>0.0150</b>     |               | 0.1545000  |
|            | (2) gp140 :FADD 1:2  | <b>0.0146</b> |                   | 0.1100            | <b>&lt;0.0001</b> |               | 0.2312500  |
|            | (3) gp140 :cFLIP 1:1 | 0.6272        | 0.1100            |                   | <b>0.0024</b>     |               | 0.1795000  |
|            | (4) pcDNA            | <b>0.0150</b> | <b>&lt;0.0001</b> | <b>0.0024</b>     |                   |               | 0.0720000  |
| 5A rt      |                      |               |                   |                   |                   |               |            |
| 2way ANOVA | (1) gp140            |               | <b>0.0001</b>     | <b>0.0272</b>     | <b>0.0001</b>     |               | 0.1586250  |
|            | (2) gp140 :FADD 1:2  | <b>0.0001</b> |                   | 0.0566            | <b>0.0001</b>     |               | 0.2380000  |
|            | (3) gp140 :cFLIP 1:1 | <b>0.0272</b> | 0.0566            |                   | <b>0.0001</b>     |               | 0.2006250  |
|            | (4) pcDNA            | <b>0.0001</b> | <b>0.0001</b>     | <b>0.0001</b>     |                   |               | 0.0705000  |



Table S1. Cont.

| Figure     | Treatment            | i/j           |               |               |               |        |        | LSmean     |
|------------|----------------------|---------------|---------------|---------------|---------------|--------|--------|------------|
|            |                      | (1)           | (2)           | (3)           | (4)           | (5)    | (6)    |            |
| 5B         |                      |               |               |               |               |        |        |            |
| 1way ANOVA | (1) gp140            |               | 0.0629        | 0.0820        | <b>0.0191</b> |        |        | 3.28000000 |
|            | (2) gp140 :FADD 1:2  | 0.0629        |               | 0.9984        | 0.7912        |        |        | 2.21000000 |
|            | (3) gp140 :cFLIP 1:1 | 0.0820        | 0.9984        |               | 0.7103        |        |        | 2.27000000 |
|            | (4) pcDNA            | <b>0.0191</b> | 0.7912        | 0.7103        |               |        |        | 1.83666667 |
| 5B         |                      |               |               |               |               |        |        |            |
| 2way ANOVA | (1) gp140            |               | <b>0.0006</b> | <b>0.0007</b> | <b>0.0001</b> |        |        | 3.36125000 |
|            | (2) gp140 :FADD 1:2  | <b>0.0006</b> |               | 0.9998        | 0.1081        |        |        | 2.22000000 |
|            | (3) gp140 :cFLIP 1:1 | <b>0.0007</b> | 0.9998        |               | 0.0933        |        |        | 2.24000000 |
|            | (4) pcDNA            | <b>0.0001</b> | 0.1081        | 0.0933        |               |        |        | 1.58000000 |
| 5C         |                      |               |               |               |               |        |        |            |
| 1way ANOVA | (1) gp140            |               | <b>0.0264</b> | 0.8048        | 0.8825        |        |        | 0.18100000 |
|            | (2) gp140 :FADD 1:2  | <b>0.0264</b> |               | 0.1167        | <b>0.0119</b> |        |        | 0.53300000 |
|            | (3) gp140 :cFLIP 1:1 | 0.8048        | 0.1167        |               | 0.4352        |        |        | 0.27450000 |
|            | (4) pcDNA            | 0.8825        | <b>0.0119</b> | 0.4352        |               |        |        | 0.09900000 |
| 5C         |                      |               |               |               |               |        |        |            |
| 2way ANOVA | (1) gp140            |               | <b>0.0001</b> | 0.1699        | 0.5144        |        |        | 0.18275000 |
|            | (2) gp140 :FADD 1:2  | <b>0.0001</b> |               | <b>0.0020</b> | <b>0.0001</b> |        |        | 0.54462500 |
|            | (3) gp140 :cFLIP 1:1 | 0.1699        | <b>0.0020</b> |               | <b>0.0122</b> |        |        | 0.30662500 |
|            | (4) pcDNA            | 0.5144        | <b>0.0001</b> | <b>0.0122</b> |               |        |        | 0.09533333 |
| 6A         |                      |               |               |               |               |        |        |            |
| 1way ANOVA | (1) gag              |               | 0.4292        | 0.9972        |               |        |        | 5.31000000 |
|            | (2) gag shRCasp8     | 0.4292        |               | 0.2981        |               |        |        | 8.15250000 |
|            | (3) gag shRFADD      | 0.9972        | 0.2981        |               |               |        |        | 4.97600000 |
|            | (4) shRNA-non        | 0.0821        | <b>0.0066</b> | 0.0902        |               |        |        | 0.07800000 |
| 6B         |                      |               |               |               |               |        |        |            |
| 1way ANOVA | (1) gag              |               | 0.2994        | 0.1068        | 0.5994        |        |        | 0.65625000 |
|            | (2) gag shRCasp8     | 0.2994        |               | 0.9385        | <b>0.0492</b> |        |        | 1.44000000 |
|            | (3) gag shRFADD      | 0.1068        | 0.9385        |               | <b>0.0155</b> |        |        | 1.67020000 |
|            | (4) shRNA-non        | 0.5994        | <b>0.0492</b> | <b>0.0155</b> |               |        |        | 0.07600000 |
| 6C         |                      |               |               |               |               |        |        |            |
| 1way ANOVA | 1) gag               |               | 0.1718        | 0.4346        | 0.9006        |        |        | 9.7475000  |
|            | 2) gag shRCasp8      | 0.1718        |               | 0.8608        | 0.5379        |        |        | 14.6100000 |
|            | 3) gag shRFADD       | 0.4346        | 0.8608        |               | 0.8884        |        |        | 12.9860000 |
|            | 4) shRNA-non         | 0.9006        | 0.5379        | 0.8884        |               |        |        | 11.3666667 |
| 7A lft     |                      |               |               |               |               |        |        |            |
| 1way ANOVA | (1) FADD Arm         |               | 0.2520        | 0.9986        | 0.9917        | 0.9449 | 0.9965 | 1.94000000 |
|            | (2) FADD Clone13     | 0.2520        |               | 0.4359        | 0.6369        | 0.0746 | 0.4809 | 1.01950000 |
|            | (3) cFLIP Arm        | 0.9986        | 0.4359        |               | 0.9999        | 0.8075 | 1.0000 | 1.78250000 |
|            | (4) cFLIP Clone13    | 0.9917        | 0.6369        | 0.9999        |               | 0.7490 | 1.0000 | 1.69333333 |
|            | (5) pcDNA Arm        | 0.9449        | 0.0746        | 0.8075        | 0.7490        |        | 0.7689 | 2.32333333 |
|            | (6) pcDNA Clone13    | 0.9965        | 0.4809        | 1.0000        | 1.0000        | 0.7689 |        | 1.75000000 |

Table S1. Cont.

| Figure               | Treatment         | i/j           |               |               |               |               |               | LSmean     |
|----------------------|-------------------|---------------|---------------|---------------|---------------|---------------|---------------|------------|
|                      |                   | (1)           | (2)           | (3)           | (4)           | (5)           | (6)           |            |
| 7A rt<br>1way ANOVA  | (1) FADD Arm      |               | 0.1792        | 0.4697        | 0.9984        | 0.9900        | 0.6762        | 0.79400000 |
|                      | (2) FADD Clone13  | 0.1792        |               | 0.9831        | 0.4236        | 0.5340        | 0.9043        | 0.33125000 |
|                      | (3) cFLIP Arm     | 0.4697        | 0.9831        |               | 0.7780        | 0.8703        | 0.9991        | 0.45450000 |
|                      | (4) cFLIP Clone13 | 0.9984        | 0.4236        |               |               | 1.0000        | 0.9180        | 0.71466667 |
|                      | (5) pcDNA Arm     | 0.9900        | 0.5340        | 0.8703        | 1.0000        |               | 0.9664        | 0.67566667 |
|                      | (6) pcDNA Clone13 | 0.6762        | 0.9043        | 0.9991        | 0.9180        | 0.9664        |               | 0.51950000 |
| 7B lft<br>1way ANOVA | (1) FADD Arm      |               | <b>0.0021</b> | 0.7171        | 0.0638        | 0.9849        | 0.1136        | 91.8250000 |
|                      | (2) FADD Clone13  | <b>0.0021</b> |               | <b>0.0340</b> | 0.7326        | <b>0.0153</b> | 0.3509        | 83.6250000 |
|                      | (3) cFLIP Arm     | 0.7171        | <b>0.0340</b> |               | 0.5034        | 0.9839        | 0.7500        | 89.4250000 |
|                      | (4) cFLIP Clone13 | 0.0638        | 0.7236        | 0.5034        |               | 0.2559        | 0.9944        | 86.1666667 |
|                      | (5) pcDNA Arm     | 0.9849        | <b>0.0153</b> | 0.9839        | 0.2559        |               | 0.4271        | 90.6333333 |
|                      | (6) pcDNA Clone13 | 0.1136        | 0.3509        | 0.7500        | 0.9944        | 0.4271        |               | 87.1250000 |
| 7B rt<br>1way ANOVA  | (1) FADD Arm      |               | 0.9032        | 0.8686        | 0.5552        | 0.9980        | 1.0000        | 3.59000000 |
|                      | (2) FADD Clone13  | 0.9032        |               | 1.0000        | 0.9729        | 0.9941        | 0.9519        | 4.29750000 |
|                      | (3) cFLIP Arm     | 0.8686        | 1.0000        |               | 0.9839        | 0.9886        | 0.9277        | 4.36000000 |
|                      | (4) cFLIP Clone13 | 0.5552        | 0.9729        | 0.9839        |               | 0.8351        | 0.6466        | 4.85333333 |
|                      | (5) pcDNA Arm     | 0.9980        | 0.9941        | 0.9886        | 0.8351        |               | 0.9998        | 3.90333333 |
|                      | (6) pcDNA Clone13 | 1.0000        | 0.9519        | 0.9277        | 0.6466        | 0.9998        |               | 3.70500000 |
| 8<br>1way ANOVA      | (1) FADD Arm      |               | 1.0000        | 1.0000        | 1.0000        | 1.0000        | <b>0.0001</b> | 3.6250     |
|                      | (2) FADD Clone13  | 1.0000        |               | 1.0000        | 1.0000        | 1.0000        | <b>0.0001</b> | 59.0000    |
|                      | (3) cFLIP Arm     | 1.0000        | 1.0000        |               | 1.0000        | 1.0000        | <b>0.0001</b> | 4.5000     |
|                      | (4) cFLIP Clone13 | 1.0000        | 1.0000        | 1.0000        |               | 1.0000        | <b>0.0001</b> | 71.4286    |
|                      | (5) pcDNA Arm     | 1.0000        | 1.0000        | 1.0000        | 1.0000        |               | <b>0.0001</b> | 3.8333     |
|                      | (6) pcDNA Clone13 | <b>0.0001</b> | <b>0.0001</b> | <b>0.0001</b> | <b>0.0001</b> | <b>0.0001</b> |               | 49,750.0   |

<sup>1</sup> Figures that have been subjected to the conventional GraphPad Prism analysis have also been subjected to a Tukey-Kramer adjustment for multiple comparisons. The data are tabulated to represent the type of treatment (Treatment), the Least squares mean (LSmean) for each treatment, and the pairwise comparisons of least squares means (i/j) with bolded numbers for significant values. Single conclusive experiments were analyzed by one-way ANOVA, as indicated in Table S1; however, in cases where a single experiment was inconclusive, data from repeat experiments was analyzed by 2-way ANOVA and tabulated after the 1-way ANOVA analysis (e.g. Figure 4B-left panel does not show a significant difference between the tetramer staining of gag-vaccinated mouse splenocytes and tetramer staining of splenocytes from mice co-inoculated with cFLIP or FADD, therefore, the Table also shows a 2-way ANOVA, that supports a significant difference). The conclusions in our discussion are supported by the additional multiple comparison analysis.
